# Supplementary material
Source: HighWire-hosted journal article supplement (https://www.rcpjournals.org/highwire/filestream/10784/field_highwire_adjunct_files/2/Hallewell_Supplementary_S3.pdf)
Supplement: Hallewell_Supplementary_S3.pdf [file Hallewell_Supplementary_S3.pdf]

## Supplementary material S3

### Medicine Return to Practice Follow-up Interview

Date

**Unique ID for pre and post course comparison. Use your initials followed by your day and month of birth** (e.g. If the name is *Aisha Patel* and they were born on the *4th July* put AP0407)

\_\_\_ / \_\_\_ / \_\_\_

|                                                                                                                                                                          |
|--------------------------------------------------------------------------------------------------------------------------------------------------------------------------|
| What are your recollections of the return to training course?                                                                                                            |
|                                                                                                                                                                          |
| Any reflections on the course?                                                                                                                                           |
|                                                                                                                                                                          |
| Do you think the course met your learning outcomes? If so, how?                                                                                                          |
|                                                                                                                                                                          |
| What specifics can you remember having learnt from the course?                                                                                                           |
|                                                                                                                                                                          |
| Have you changed your personal behaviour since the course? If so, how?                                                                                                   |
|                                                                                                                                                                          |
| Have you implemented any wider changes since the course? If so, what?                                                                                                    |
|                                                                                                                                                                          |
| Do you have any future plans from this course? Either in terms of your personal or professional development, motivation and learning or action plans for your workplace. |
|                                                                                                                                                                          |
